# Supplementary material for: Facile approach for a robust graphene/silver nanowires aerogel with high-performance electromagnetic interference shielding
Source: Royal Society of Chemistry journal article supplement (doi:10.1039/c8ra08738e), 2018-12-20
Supplement: c8ra08738e1.pdf [file c8ra08738e1.pdf]

## Supplementary Information

### Facile approach for robust graphene/silver nanowires aerogel with high-performance electromagnetic interference shielding

Xiaoting Liu<sup>a</sup>, Tianrui Chen<sup>a</sup>, Hao Liang<sup>a</sup>, Faxiang Qin<sup>a</sup>, Hui Yang<sup>a,b</sup> and Xingzhong Guo<sup>\*a,b</sup>

<sup>a</sup> State Key Laboratory of Silicon Materials, School of Materials Science and Engineering,  
Zhejiang University, Hangzhou 310027, PR China; <sup>b</sup> Zhejiang-California International  
NanoSystems Institute, Zhejiang University, Hangzhou 310058, PR China

\*Corresponding authors. E-mail: [msewj01@zju.edu.cn](mailto:msewj01@zju.edu.cn)

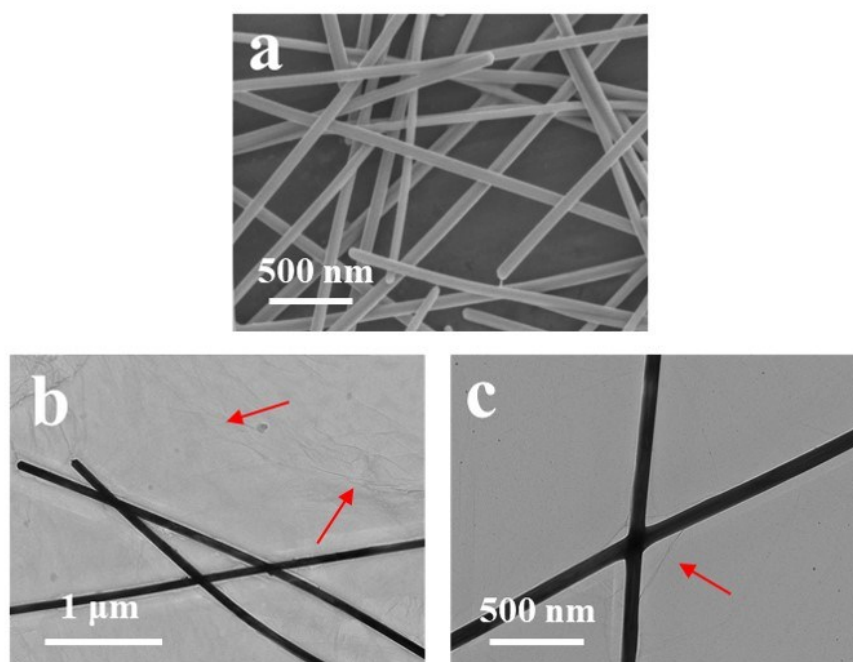

Fig. S1 (a) Typical SEM images of AgNWs and (b), (c) TEM images of GO/AgNWs composite.

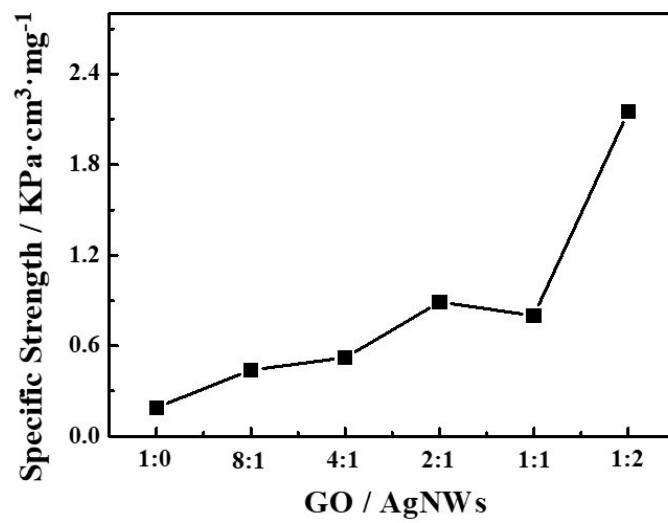

Fig. S2 The specific strengths of RGO/AgNWs aerogels with different mass ratios.

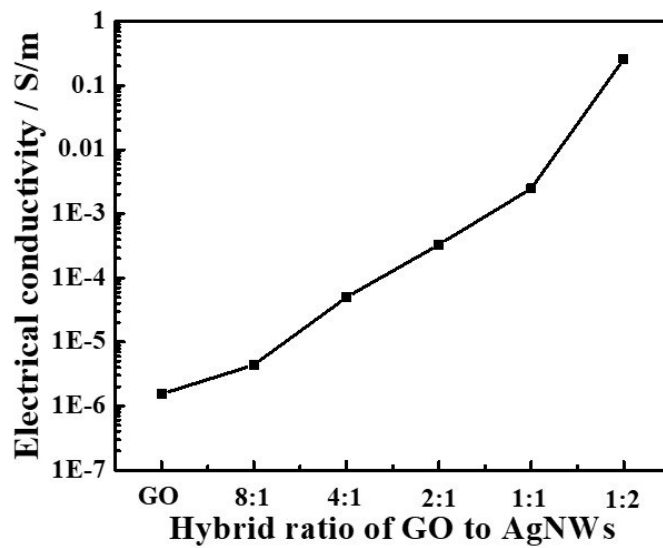

Fig. S3 The electrical conductivity of RGO/AgNWs aerogel with different mass ratios.

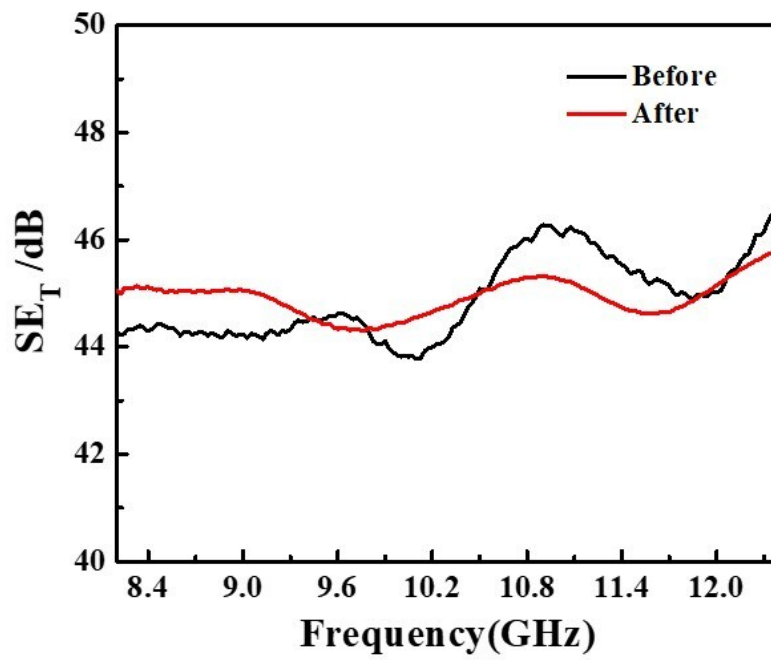

Fig. S4 The EMI SE of hybrid aerogels (1:2) after six months in the frequency range from 8.2 to 12.4 GHz.

Table S1 EMI shielding performance of several typical materials.

| Features                     | Matrices                     | Fillers                                 | Density (g/m <sup>3</sup> ) | EMI SE (dB)   | Specific EMI SE (dB·cm <sup>3</sup> ·g <sup>-1</sup> ) | Reference        |
|------------------------------|------------------------------|-----------------------------------------|-----------------------------|---------------|--------------------------------------------------------|------------------|
| Energy-consuming             | GO (2000°C)                  |                                         |                             | 19.1          |                                                        | 1                |
|                              | CNT (CVD)                    | Graphene                                | 0.0089                      | 47.5          | 5337                                                   | 2                |
|                              | Graphene (CVD)               | PEDOT/PSS                               | 0.029                       | 91.9          | 3124                                                   | 3                |
|                              | Graphene (CVD)               | CNT                                     | 0.09                        | 75            | 833                                                    | 4                |
|                              | PANI-NGF                     | MWCNTs                                  |                             | 98            |                                                        | 5                |
|                              | GO (HI, 3000°C)              |                                         | 0.06                        | 135           | 2250                                                   | 6                |
|                              | GO, resorcinol, formaldehyde |                                         | 0.075                       | 20            | 267                                                    | 7                |
|                              | porous carbon                | Fe                                      |                             | 40            |                                                        | 8                |
| Toxic                        | GO, CNF (HI)                 |                                         |                             | 26.2          |                                                        | 9                |
|                              | GO (Hydrazine)               |                                         | 0.06                        | 25.2          | 420                                                    | 10               |
|                              | GO (HI)                      | Sodium alginate                         |                             | 25.7          |                                                        | 11               |
|                              | GO (Hydrazine)               |                                         | 0.0055                      | 27.6          | 5018                                                   | 12               |
|                              | GO (Hydrazine)               | Polydopamine                            | 0.05                        | 26.5          | 530                                                    | 13               |
| Eco-friendly & Energy-saving | Carbon Texture               | Graphene                                | 0.07                        | 36            | 514                                                    | 14               |
|                              | TPU                          | Fe <sub>3</sub> O <sub>4</sub> , MWCNTs |                             | 32            |                                                        | 15               |
|                              | PS                           | Graphene                                | 0.45                        | 29            | 64.4                                                   | 16               |
|                              | PLA                          | CNT                                     | 0.1                         | 22.7          | 216                                                    | 17               |
|                              | biomass-derived SrGO         |                                         |                             | 38.6          |                                                        | 18               |
|                              | PEI foam                     | Graphene                                | 0.3                         | 11            | 44.1                                                   | 19               |
|                              | PMMA foam                    | Graphene                                | 0.79                        | 20            | 25                                                     | 20               |
|                              | Cellulose filter paper       | Carbon nanofiber                        |                             | 24.6          |                                                        | 21               |
|                              | Cellulose                    | CNTs                                    | 0.095                       | 20.8          | 219                                                    | 22               |
|                              | PLA foam                     | Graphite                                | 0.7                         | 45            | 64                                                     | 23               |
|                              | PS foam                      | mGr                                     | 0.24                        | 22            | 92                                                     | 24               |
|                              | Carbon                       | Cenosphere                              | 0.32                        | 48.6          | 152                                                    | 25               |
|                              |                              | <b>Graphene/AgNWs(4:1)</b>              |                             | <b>0.0075</b> | <b>25.4</b>                                            | <b>3401</b>      |
|                              | <b>Graphene/AgNWs(1:2)</b>   |                                         | <b>0.019</b>                | <b>45.2</b>   | <b>2372</b>                                            | <b>This work</b> |

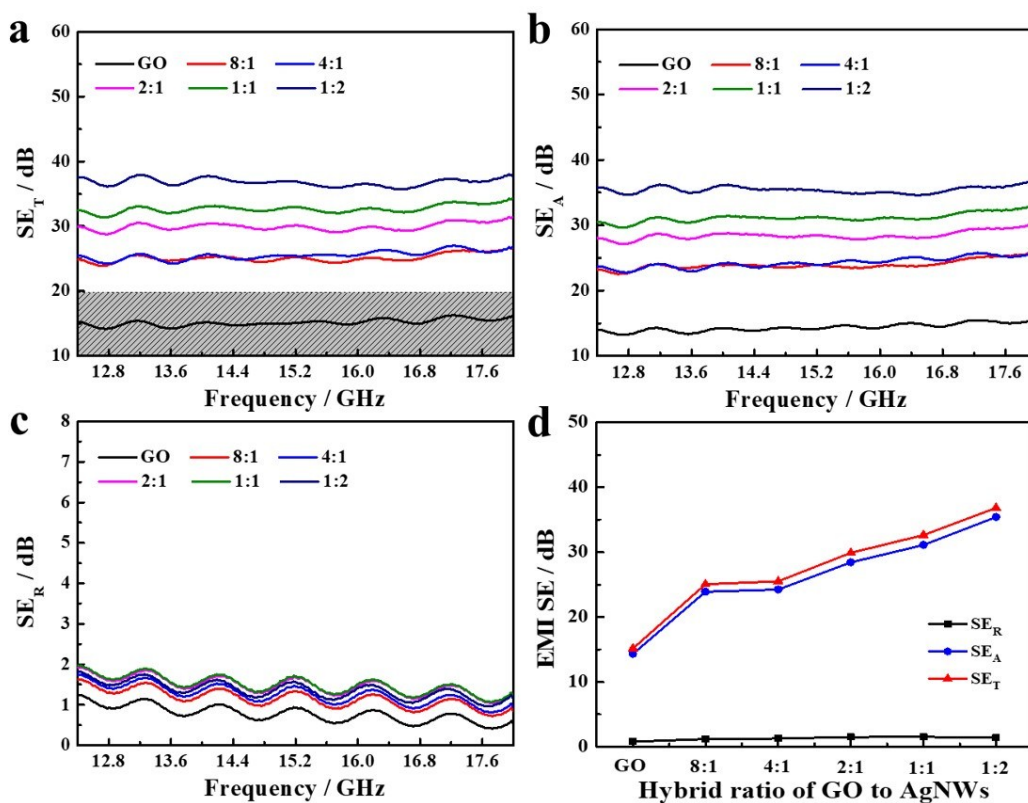

Fig. S5 The comparison of EMI shielding performances of RGO/AgNWs aerogel with different mass ratios in the frequency range from 12.4 to 18 GHz.

## References

- 1 B. Shen, W. T. Zhai and W. G. Zheng, *Adv. Funct. Mater.*, 2014, **24**, 4542-4548.
- 2 Q. Song, F. Ye, X. W. Yin, W. Li, H. J Li, Y. S. Liu, K. Z. Li, K. Y Xie, X. H. Li, Q. G. Fu, L. F. Cheng, L. T. Zhang and B. Q Wei, *Adv. Mater.*, 2017, **29**, 1701583.
- 3 Y. Wu, Z. Y. Wang, X. Liu, X. Shen, Q. B. Zheng, Q. Xue and J. K. Kim, *Acs Appl. Mater. Inter.*, 2017, **9**, 9059-9069.
- 4 X. Y. Sun, X. Liu, X. Shen, Y. Wu, Z. Y. Wang and J. K. Kim, *Compos. Part A*, 2016, **85**, 199-206.
- 5 T. K. Gupta, B. P. Singh, R. B. Mathur and S. R. Dhakate, *Nanoscale*, 2013, **6**, 842-851.
- 6 J. B. Xi, Y. L. Li, E. Z. Zhou, Y. J. Liu, W. W. Gao, Y. Guo, J. Ying, Z. C. Chen, G. G. Chen and C. Gao, *Carbon*, 2018, **135**, 44-51.
- 7 S. Singh, P. Tripathi, A. Bhatnagar, Ch. R. P. Patel, A. P. Singh, S. K. Dhawan, B. K. Gupta and O. N. Srivastava, *Rsc Adv.*, 2015, **5**, 107083-107087.
- 8 Q. L. Liu, J. J. Gu, W. Zhang, Y. Miyamoto, Z. X. Chen and D. Zhang, *J. Mater. Chem. C*, 2012, **22**, 21183-21188.
- 9 W. X. Yang, Z. D. Zhao, K. Wu, R. Huang, T. Y. Liu, H. Jiang, F. Chen and Q. Fu, *J. Mater. Chem. C*, 2017, **5**, 3748-3756.
- 10 B. Shen, Y. Li, D. Yi, W. T. Zhai, X. C. Wei and W. G. Zheng, *Carbon*, 2016, **102**, 154-160.
- 11 L. C. Jia, W. J. Sun, C. G. Zhou, D. X. Yan, Q. C Zhang and Z. M. Li, *J. Mater. Chem. C*,

2018, **6**, 9166-9174.

12 S. G. Bi, L. Y. Zhang, C. Z. Mu, M. Liu and X. Hu, *Appl. Surf. Sci.*, 2017, **412**, 529-536.

13 L. Y. Zhang, M. Liu, S. G. Bi, L. P. Yang, S. Roy, X. Z. Tang, C. Z. Mu and X. Hu, *J. Colloid Interface Sci.*, 2017, **493**, 327-333.

14 W. L. Song, X. T. Guan, L. Z. Fan, W. Q. Cao, C. Y. Wang and M. S. Cao, *Carbon*, 2015, **93**, 151-160.

15 A. V. Menon, G. Madras and S. Bose, *Chem. Eng. J.*, 2018, **352**, 590-600.

16 D. X. Yan, P. G. Ren, H. Pang, Q. Fu, M. B. Yang and Z. M. Li, *J. Mater. Chem.*, 2012, **22**, 18772-18774.

17 C. H. Cui, D. X. Yan, H. Pang, L. C. Jia, X. Xu, S. Yang, J. Z. Xu and Z. M. Li, *Chem. Eng. J.*, 2017, **323**, 29-36.

18 F. Shahzad, P. Kumar, Y. H. Kim, S. M. Hong and C. M. Koo, *Acs Appl. Mater. Inter.*, 2016, **8**, 9361-9369.

19 J. Q. Ling, W. T. Zhai, W. W. Feng, B. Shen, J. F. Zhang and W. G. Zheng, *Acs Appl. Mater. Inter.*, 2013, **5**, 2677-2684.

20 H. B. Zhang, Q. Yan, W. G. Zheng, Z. X. He and Z. Z. Yu, *Acs Appl. Mater. Inter.*, 2011, **3**, 918-924.

21 S. Mondal, S. Ganguly, P. Das, P. Bhawal, T. K. Das, L. Nayak, D. Khastgir and N. C. Das, *Cellulose*, 2017, **24**, 5117-5131.

22 H. D. Huang, C. Y. Liu, D. Zhou, X. Jiang, G. J. Zhong, D. X. Yan and Z. M. Li, *J. Mater. Chem. A*, 2015, **3**, 4983-4991.

23 G. L. Wang, G. Q. Zhao, S. Wang, L. Zhang and C. B. Park, *J. Mater. Chem. C*, 2018, **6**, 6847-6859.

24 Z. Y. Min, H. Yang, F. Chen and T. R. Kuang, *Mater. Lett.*, 2018, **230**, 157-160.

25 R. Kumar, D. P. Mondal, A. Chaudhary, M. Shafeeq and S. Kumari, *Compos. Part A*, 2018, **112**, 475-484.
